# Supplementary material
Source: Springer Nature journal article supplement (https://www.springermedizin.de/resource/supplementary/12913_2013_3743_MOESM4_ESM.pdf/9532298)
Supplement: MOESM4 [file 9532298]

| Variables                                  | Village health volunteers |                         | Health center staff |                         |
|--------------------------------------------|---------------------------|-------------------------|---------------------|-------------------------|
|                                            | odd ratio                 | 95% Confidence interval | odd ratio           | 95% Confidence interval |
| Age                                        | 1.30                      | 0.85-1.98               | 1.18                | 0.78-1.80               |
| Distance between village and health center | 1.20                      | 0.80-1.78               | 1.00                | 0.67-1.50               |
| Education attainment                       | 2.28                      | 1.08-4.80               | 1.96                | 0.94-4.08               |
| Number of training sessions attended       | 1.75                      | 1.11-2.76               | 1.71                | 1.08-2.71               |
| Structural Social Capital                  |                           |                         |                     |                         |
| group membership                           | 1.17                      | 0.91-1.50               | 1.19                | 0.92-1.54               |
| support from groups                        | 1.37                      | 1.08-1.73               | 1.25                | 1.00-1.58               |
| support from individuals                   | 1.13                      | 0.94-1.35               | 1.10                | 0.91-1.32               |
| citizenship activities                     | 2.40                      | 1.51-3.80               | 1.70                | 1.10-2.61               |
| Cognitive Social Capital                   |                           |                         |                     |                         |
| cognitive social capital                   | 6.11                      | 2.08-18.00              | 1.64                | 0.90-2.80               |
